# Supplementary material for: Directed Evolution of a Halide Methyltransferase Enables Biocatalytic Synthesis of Diverse SAM Analogs
Source: PubMed Central journal article supplement — Angew Chem Int Ed Engl. 2020 Nov 12;60(3):1524–7. doi: 10.1002/anie.202013871 (PMC7839550; doi:10.1002/anie.202013871), 2020-11-12
Supplement: ANIE-60-1524-s001.pdf [file ANIE-60-1524-s001.pdf]

## Supporting Information

### **Directed Evolution of a Halide Methyltransferase Enables Biocatalytic Synthesis of Diverse SAM Analogs**

*Qingyun Tang, Christoph W. Grathwol, Aşkın S. Aslan-Üzel, Shuke Wu, Andreas Link, Ioannis V. Pavlidis,\* Christoffel P. S. Badenhorst,\* and Uwe T. Bornscheuer\**

anie\_202013871\_sm\_miscellaneous\_information.pdf

## Table of Contents

|                                                                                                           |    |
|-----------------------------------------------------------------------------------------------------------|----|
| Additional results.....                                                                                   | 4  |
| Initial characterization of different HMTs .....                                                          | 4  |
| Comparison of the iodide assay to HPLC .....                                                              | 6  |
| Screening for improved ethyltransferase activity.....                                                     | 7  |
| Characterization of the hits.....                                                                         | 9  |
| Michaelis-Menten kinetics for methyltransferase activity .....                                            | 10 |
| Michaelis-Menten kinetics for ethyltransferase activity .....                                             | 11 |
| Preparative scale synthesis of SAM analogues and product analysis .....                                   | 13 |
| Preparative scale bioalkylation cascade reactions and product analysis.....                               | 15 |
| Experimental procedures .....                                                                             | 25 |
| Materials .....                                                                                           | 25 |
| Method S1    Genes, protein expression, and mutagenesis .....                                             | 25 |
| Method S1.1    Expression vectors .....                                                                   | 25 |
| Method S1.2    Site-saturation mutagenesis.....                                                           | 25 |
| Method S1.3    Construction of the MTA/SAH nucleosidase knockout <i>E. coli</i><br>BL21(DE3) strain ..... | 27 |
| Method S2    High-throughput screening .....                                                              | 29 |
| Method S2.1    Expression of variants in the NNK libraries .....                                          | 29 |
| Method S2.2    HMT assay and general screening workflow.....                                              | 29 |
| Method S3    The iodide assay for high-throughput screening .....                                         | 30 |
| Method S3.1    Assay principle .....                                                                      | 30 |
| Method S3.2    Preparation of the assay reagent .....                                                     | 31 |
| Method S3.3    Iodide quantification and calibration curves.....                                          | 31 |
| Method S3.4    Expression, purification, and activity determination of CVCPO ..                           | 31 |
| Method S4    Characterization of purified HMTs .....                                                      | 32 |
| Method S4.1    Expression and purification of HMTs and MTs.....                                           | 32 |
| Method S4.2    HMT specific activity and kinetic measurements.....                                        | 33 |
| Method S4.3    HPLC analysis of MT and HMT reactions .....                                                | 33 |
| Method S5    Preparative-scale HMT reactions .....                                                        | 34 |
| Method S5.1    Preparative-scale production of SAM analogues and alkylated<br>compounds .....             | 34 |
| Method S5.2    Preparative HPLC purification .....                                                        | 35 |
| Method S5.3    NMR spectroscopy .....                                                                     | 35 |
| Protein sequences .....                                                                                   | 36 |
| References.....                                                                                           | 38 |

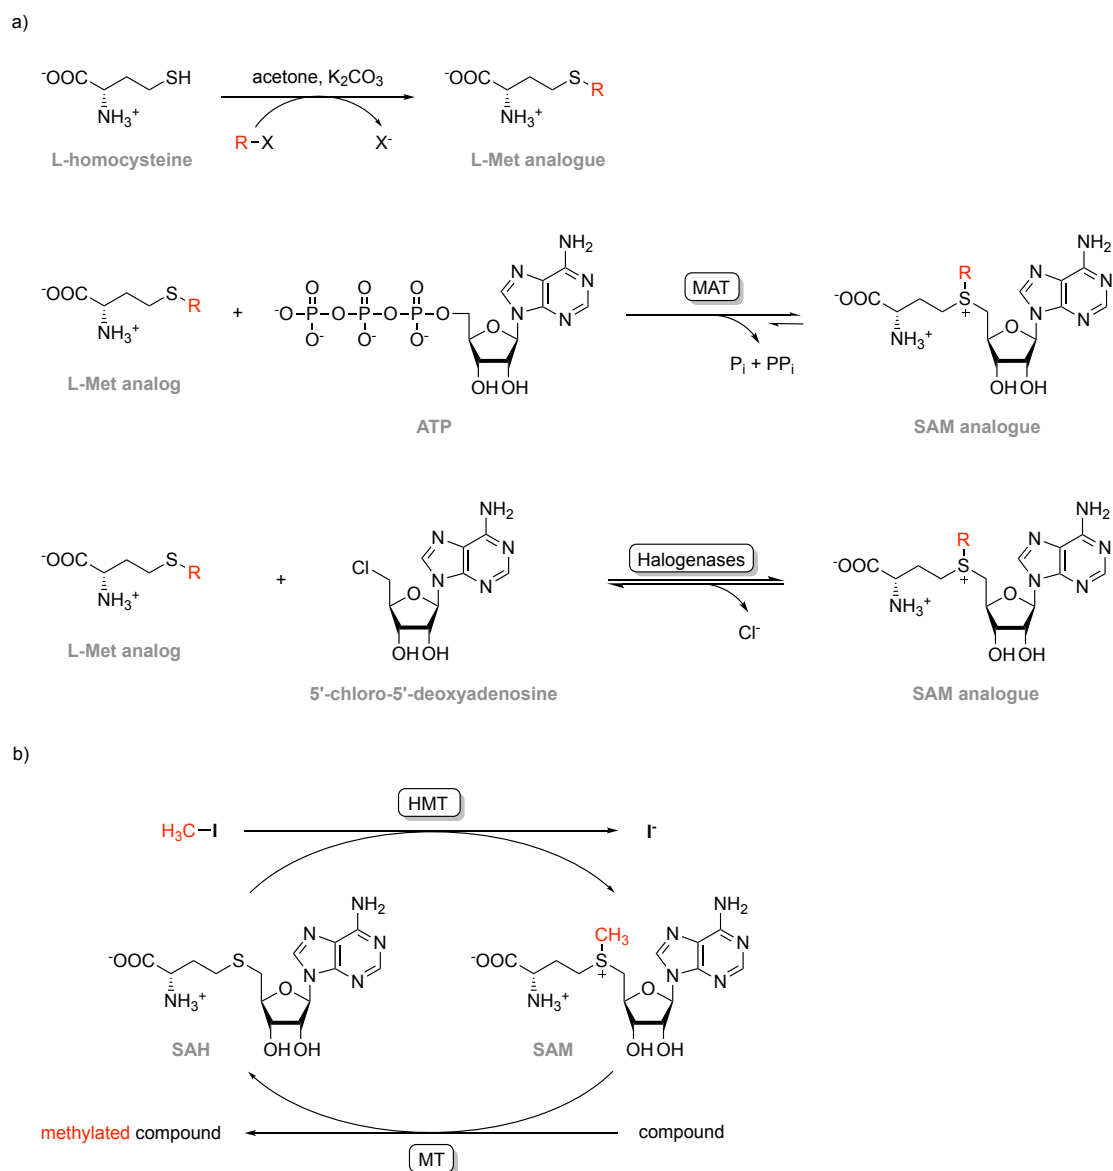

**Figure S1. Enzymatic synthesis of SAM analogues.** a) L-methionine analogues can be chemically synthesized from L-homocysteine and alkyl halides. Methionine adenosyltransferases (MATs) or halogenases can then use ATP or 5'-chloro-5'-deoxyadenosine, respectively, to convert the L-methionine analogues to the corresponding SAM analogues. b) Halide methyltransferases (HMTs) can convert S-adenosyl homocysteine (SAH) to S-adenosyl methionine (SAM) in a single step, using methyl iodide as alkyl donor. This enables a simple regeneration of SAM from SAH, facilitating methyltransferase (MT)-catalyzed methylation of acceptor compounds using only catalytic amounts of SAH.<sup>[1]</sup> The purpose of our study was to expand the substrate specificity of an HMT to allow SAM analogues to be synthesized.

## Additional results

### Initial characterization of different HMTs

**Table S1.** Specific activities ( $\mu\text{mol}/\text{min}/\text{mg}$ ) of HMTs towards different alkyl iodides for synthesizing the corresponding SAM analogues.<sup>[a]</sup>

| Enzyme                                      |  |  |  |  |
|---------------------------------------------|-----------------------------------------------------------------------------------|-----------------------------------------------------------------------------------|-------------------------------------------------------------------------------------|-------------------------------------------------------------------------------------|
| <i>Arabidopsis thaliana</i> HMT             | 5942 $\pm$ 204                                                                    | 2.69 $\pm$ 0.15                                                                   | <0.01                                                                               | <0.01                                                                               |
| <i>Chloracidobacterium thermophilum</i> HMT | 132 $\pm$ 9                                                                       | 0.11 $\pm$ 0.07                                                                   | <0.01                                                                               | <0.01                                                                               |
| <i>Raphanus sativus</i> HMT                 | 8457 $\pm$ 361                                                                    | 1.18 $\pm$ 0.11                                                                   | <0.01                                                                               | <0.01                                                                               |

<sup>[a]</sup> Reaction times were 10 min for methyl iodide and ethyl iodide, and 4h for propyl iodide and butyl iodide. Negative controls performed without enzyme were subtracted. Activities were determined using the iodide assay described in Figure S2 and Method S3. Data reported are the means and standard deviations calculated from three independent measurements.

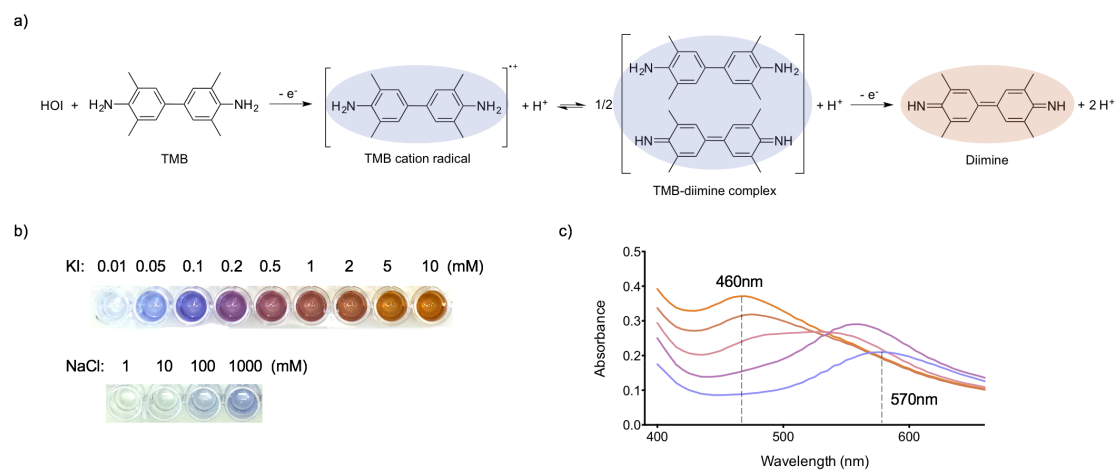

**Figure S2. The iodide assay used for screening HMT libraries. a)** Oxidation of TMB by HOI. **b)** Color of reaction mixtures of KI and NaCl (1  $\mu$ l; various concentrations) with the iodide assay solution (50  $\mu$ l) after 30min. **c)** Absorbance spectra of the TMB oxidation products.

## Comparison of the iodide assay to HPLC

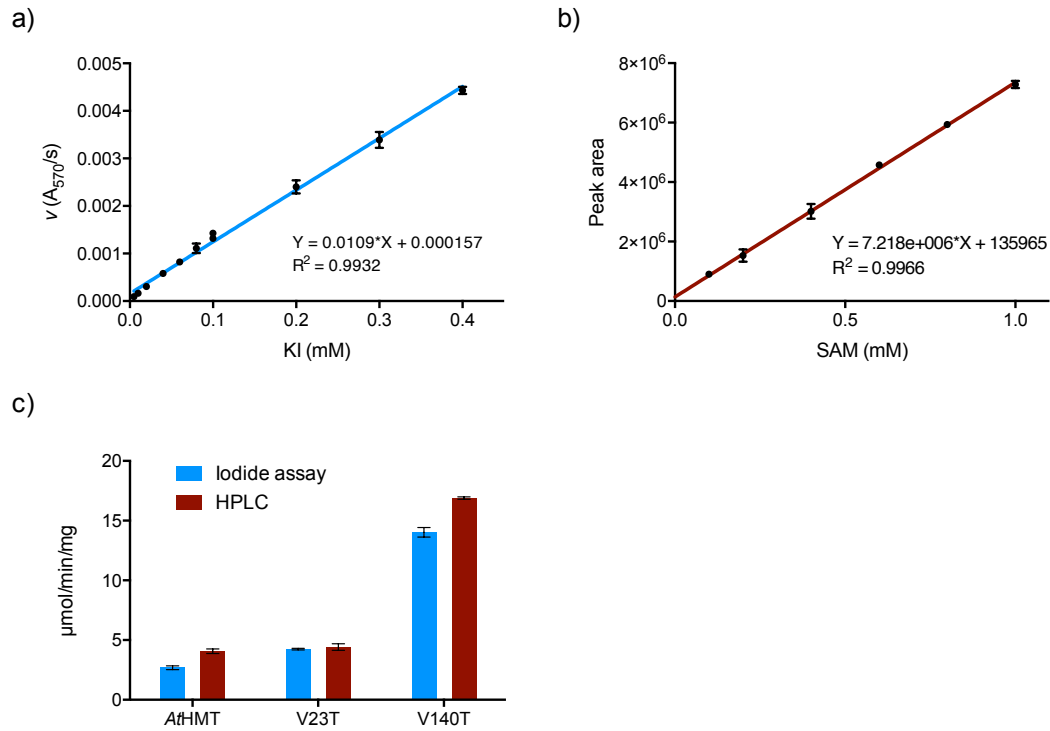

**Figure S3. Comparison of the iodide assay to HPLC.** **a)** Calibration curve for the iodide assay. The concentration of potassium iodide (KI) is plotted against the initial velocity of the increase in absorbance at 570 nm. **b)** Calibration curve for HPLC analysis of SAM. The concentration of SAM is plotted against the peak area determined by HPLC. **c)** Comparison of the ethyltransferase specific activities of wild-type AtHMT and the V23T and V140T variants determined using the iodide assay and HPLC. Data plotted are the means and standard deviations calculated from three independent measurements.

## Screening for improved ethyltransferase activity

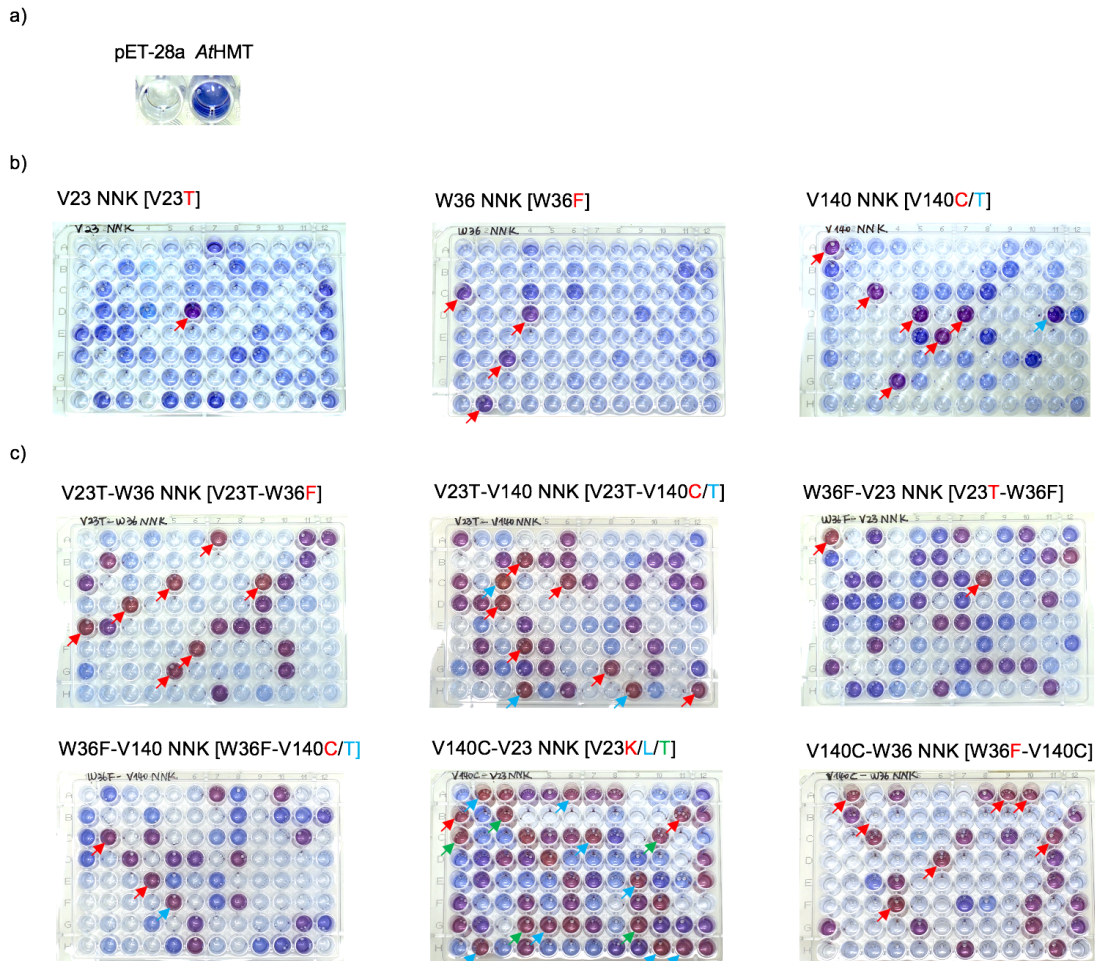

**Figure S4. Examples of the iodide screening assay.** Libraries were screened as described in Methods S2 and S3.

- a) The empty pET-28a vector and the wild-type *AthHMT* as negative and positive controls, respectively. b) Screening of NNK libraries at positions V23, W36, and V140. Hits are indicated with colored arrows and named in square brackets. c) Screening of libraries at secondary positions. Hits are indicated with colored arrows and named in square brackets.

**Table S2.** Libraries screened and hits obtained.

| Library       | Hits           |
|---------------|----------------|
| P20 NNK       | -              |
| V23 NNK       | V23T           |
| L27 NNK       | -              |
| W36 NNK       | W36F           |
| W47 NNK       | -              |
| Y139 NNK      | -              |
| V140 NNK      | V140C/T        |
| C143 NNK      | -              |
| Y172 NNK      | -              |
| R214 NNK      | -              |
| V23T-W36 NNK  | V23T-W36F      |
| V23T-V140 NNK | V23T-V140C/T   |
| W36F-V23 NNK  | V23T-W36F      |
| W36F-V140 NNK | W36F-V140C/T   |
| V140C-V23 NNK | V23K/L/T-V140C |
| V140C-W36 NNK | W36F-V140C     |



## Characterization of the hits

**Table S3.** Specific activities ( $\mu\text{mol}/\text{min}/\text{mg}$ ) of the wild-type AtHMT and mutants against ethyl iodide for synthesizing SAE.

| Enzyme variant  | Specific activity <sup>[a]</sup> |
|-----------------|----------------------------------|
| AtHMT           | $2.69 \pm 0.15$                  |
| V23T            | $4.24 \pm 0.07$                  |
| W36F            | $2.80 \pm 0.35$                  |
| V140C           | $9.74 \pm 0.85$                  |
| V140T           | $14.02 \pm 0.40$                 |
| V23T-W36F       | $3.81 \pm 0.23$                  |
| V23T-V140C      | $10.28 \pm 0.94$                 |
| V23T-V140T      | $8.77 \pm 1.39$                  |
| V23K-V140C      | $6.23 \pm 0.34$                  |
| V23L-V140C      | $9.00 \pm 0.62$                  |
| W36F-V140C      | $8.21 \pm 0.73$                  |
| W36F-V140T      | $1.95 \pm 0.15$                  |
| V23T-W36F-V140C | $6.74 \pm 0.11$                  |
| V23K-W36F-V140C | $0.42 \pm 0.03$                  |
| V23L-W36F-V140C | $1.59 \pm 0.27$                  |
| V23T-W36F-V140T | $1.32 \pm 0.19$                  |

<sup>[a]</sup> Data reported are the means and standard deviations calculated from three independent measurements. The data are visualized in Figure 2 of the main paper.

## Michaelis-Menten kinetics for methyltransferase activity

a) AtHMT

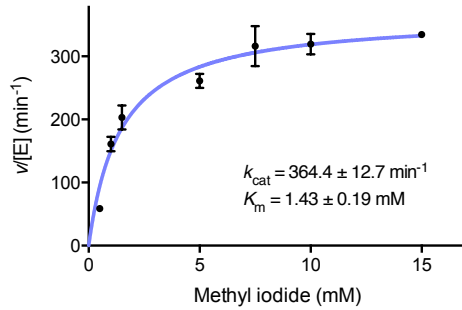

b) V140T

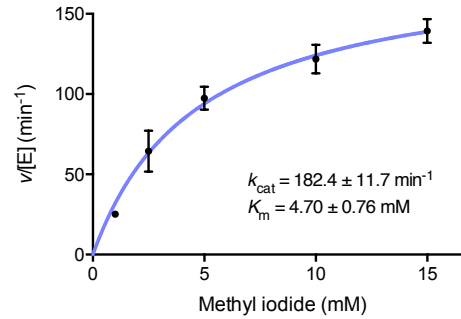

**Figure S5. Michaelis-Menten kinetics for methyltransferase activity. a)** Wild-type AtHMT and **b)** the V140T variant.

Activities at various methyl iodide concentrations were determined as described in Method S4.2. Data plotted are the means and standard deviations calculated from three independent measurements.

## Michaelis-Menten kinetics for ethyltransferase activity

a) AtHMT

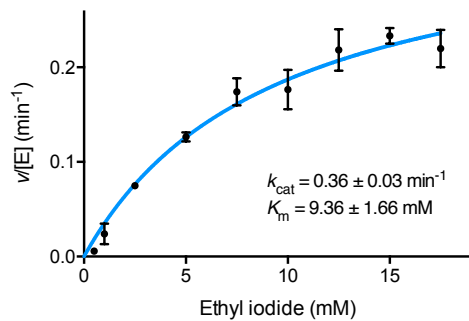

b) V140T

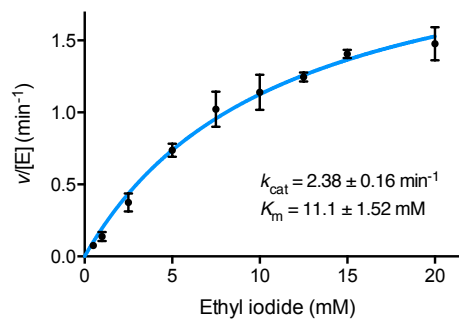

**Figure S6. Michaelis-Menten kinetics for ethyltransferase activity.** a) Wild-type AtHMT and b) the V140T variant. Activities at various ethyl iodide concentrations were determined as described in Method S4.2. Data plotted are the means and standard deviations calculated from three independent measurements.

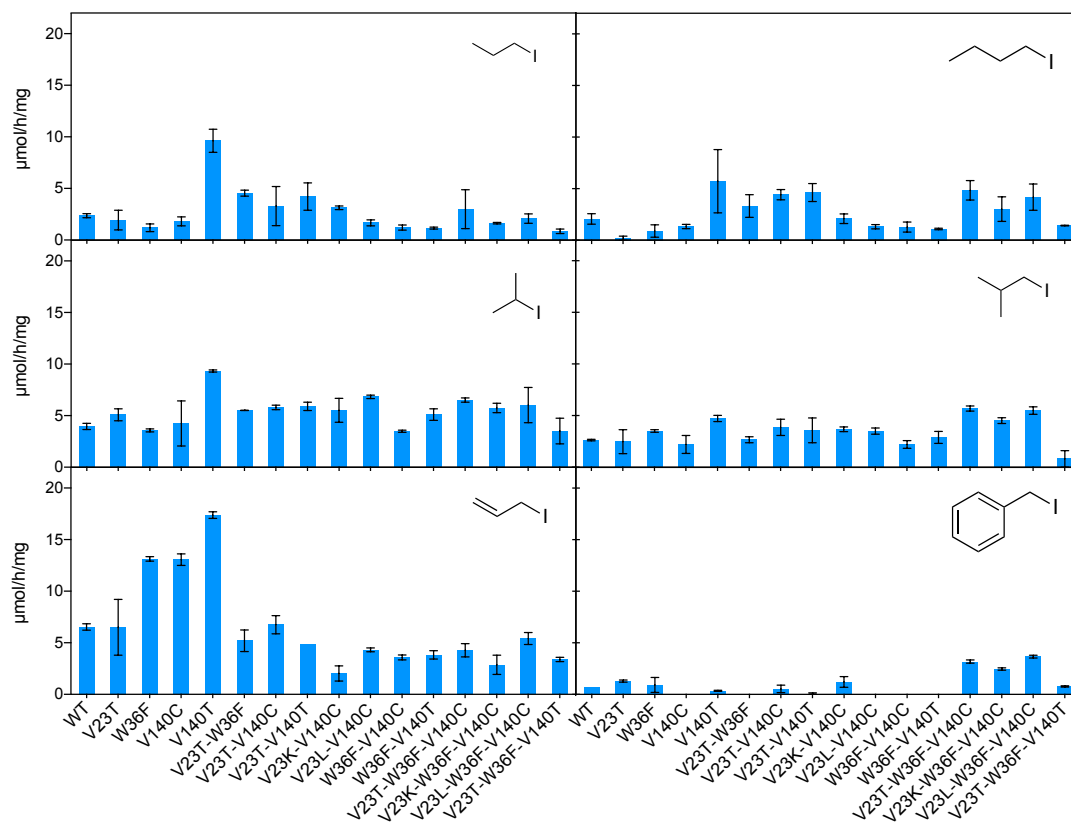

**Figure S7.** Specific activities ( $\mu\text{mol/h/mg}$ ) of AtHMT and several variants towards various alkyl iodides for synthesizing the corresponding SAM analogues. Specific activities were determined as described in Methods S3.3 and S4.2. Data plotted are the means and standard deviations calculated from two independent measurements.

## Preparative scale synthesis of SAM analogues and product analysis

**Table S4.** Scaled-up production of SAM analogues.

| SAH           | Alkyl iodide  | V140T AtHMT             | Product          | Reaction time | Conversion <sup>[a]</sup> |
|---------------|---------------|-------------------------|------------------|---------------|---------------------------|
| 15 mg (10 mM) | 80 mM EtI     | 5.0 mg/ml (182 $\mu$ M) | SAE ( <b>2</b> ) | 14h           | 90%                       |
| 15 mg (10 mM) | 80 mM PrI     | 7.7 mg/ml (273 $\mu$ M) | SAP ( <b>3</b> ) | 24h           | 50%                       |
| 15 mg (10 mM) | 80 mM Allyl-I | 5.0 mg/ml (182 $\mu$ M) | SAA ( <b>4</b> ) | 14h           | 70%                       |

<sup>[a]</sup>Determined by HPLC (Figure S9).

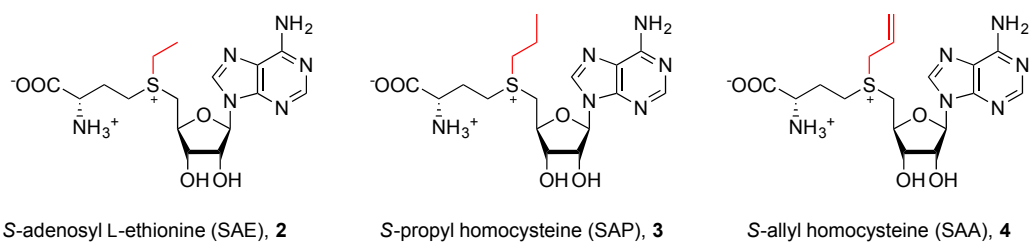

**Figure S8.** Structures of the SAM analogues. The iodoalkane-derived alkyl groups are shown in red.

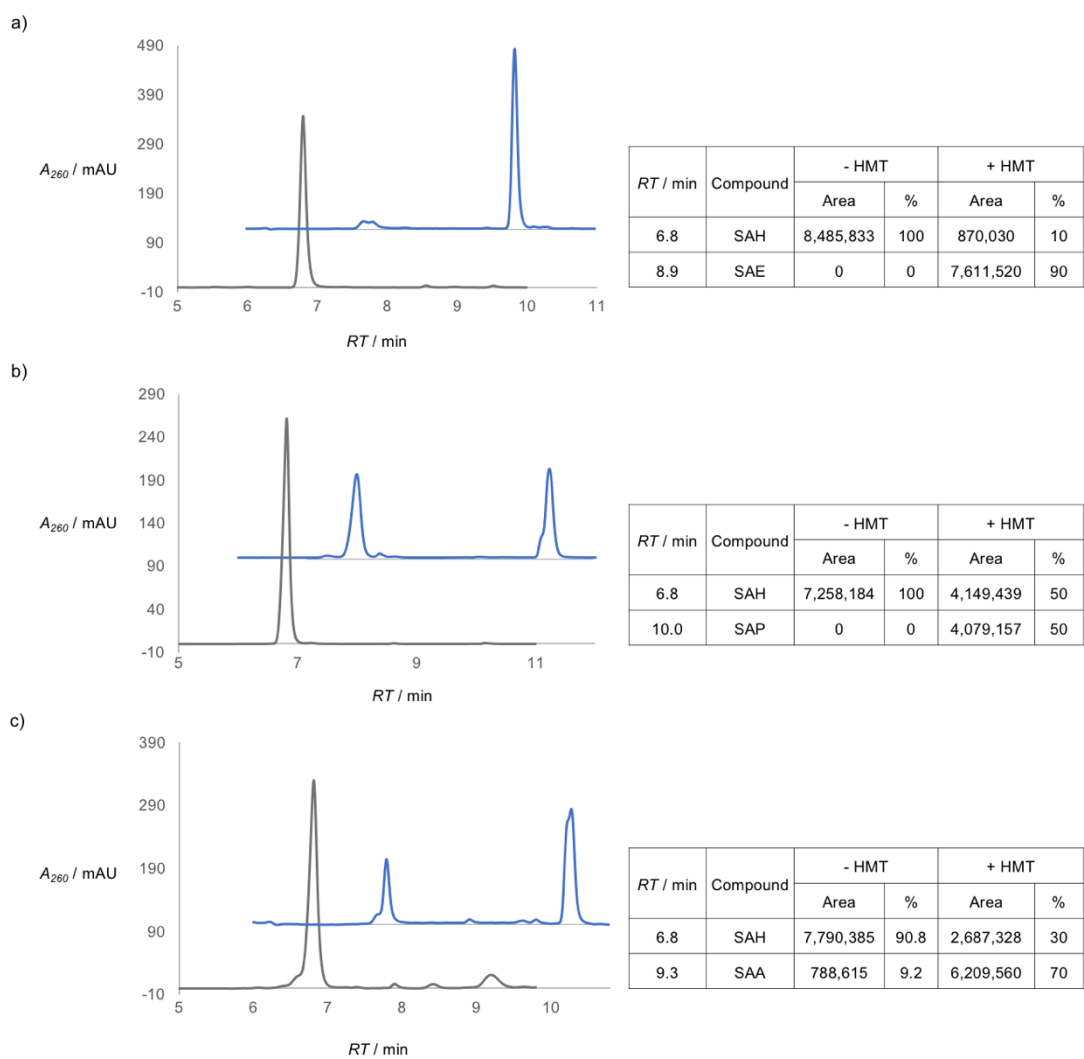

**Figure S9.** HPLC chromatograms of **a)** SAE (**2**), **b)** SAP (**3**), and **c)** SAA (**4**) syntheses on preparative scale. Structures of the SAM analogues are shown in Figure S8.

## Preparative scale bioalkylation cascade reactions and product analysis

**Table S5.** Scaled-up production of alkylated products.

| Substrate                   | Alkyl iodide     | SAH         | MT                               | HMT <sup>[a]</sup>        | Product        | Reaction time | Conversion <sup>[b]</sup> | Isolated yield | Number of cycles |
|-----------------------------|------------------|-------------|----------------------------------|---------------------------|----------------|---------------|---------------------------|----------------|------------------|
| <b>5</b> , 20 mg<br>(10 mM) | EtI<br>80 mM     | 100 $\mu$ M | leOMT, 12 mg/ml<br>(292 $\mu$ M) | 10 mg/ml<br>(364 $\mu$ M) | <b>6</b>       | 72h           | 41%                       | 18%            | 41               |
| <b>7</b> , 10 mg<br>(10 mM) | PrI<br>80 mM     | 100 $\mu$ M | COMT, 12 mg/ml<br>(292 $\mu$ M)  | 10 mg/ml<br>(364 $\mu$ M) | <sup>[c]</sup> | 48h           | 5%                        | -              | -                |
| <b>7</b> , 10 mg<br>(10 mM) | Allyl-I<br>80 mM | 100 $\mu$ M | COMT, 12 mg/ml<br>(292 $\mu$ M)  | 8 mg/ml<br>(291 $\mu$ M)  | <b>8</b>       | 24h           | 48%                       | 16%            | 48               |

<sup>[a]</sup> *At*HMT-V140T was used for all reactions. <sup>[b]</sup> Conversions were determined using HPLC (Figure S11). <sup>[c]</sup> Because of the low conversion, this product was not purified and identified by NMR spectroscopy.

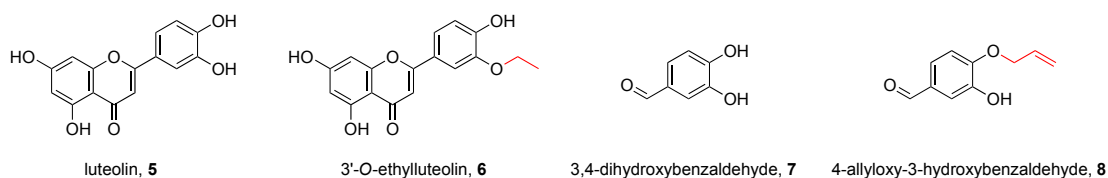

**Figure S10.** Structures of substrates and alkylated products. The iodoalkane-derived alkyl groups are shown in red.

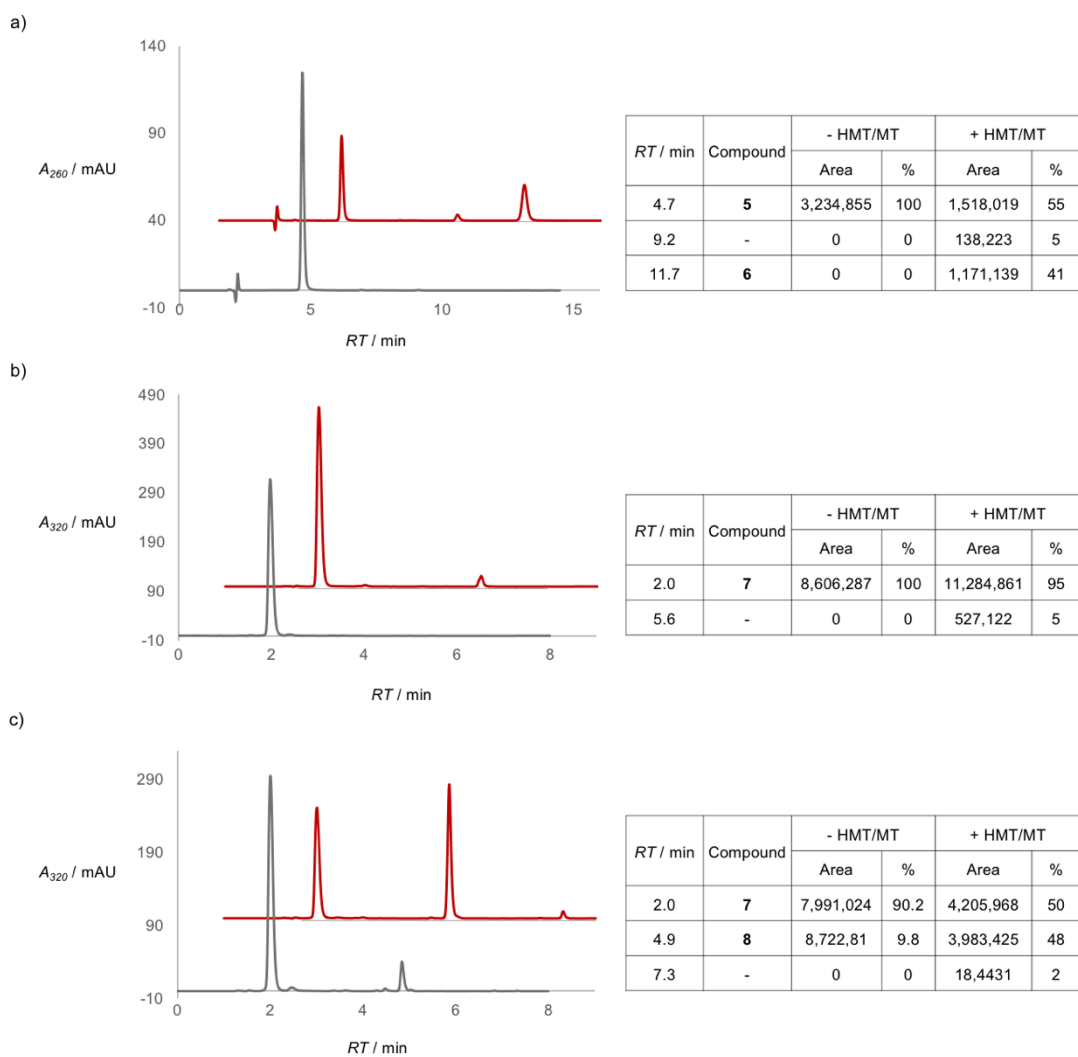

**Figure S11.** HPLC chromatograms of **a)** luteolin (**5**) and the product 3'-O-ethyl luteolin (**6**), **b)** 3,4-dihydroxybenzaldehyde (**7**) and the propylated product, and **c)** 3,4-dihydroxybenzaldehyde (**7**) and the product 4-allyloxy-3-hydroxy-benzaldehyde (**8**).



**3'-O-ethyl-luteolin (6).**  $^1\text{H}$  NMR, H,H-COSY (400 MHz,  $\text{DMSO-}d_6$ ):  $\delta$  (ppm) = 12.96 (s, 1H, OH), 7.55 (d,  $J = 1.8$  Hz, 1H, 6'-H), 7.53 (s, 1H, 2'-H), 6.94 (d,  $J = 8.9$  Hz, 1H, 5'-H), 6.84 (s, 1H, 3'-H), 6.47 (s, 1H, 8-H), 6.17 (s, 1H, 6-H), 4.15 (q,  $J = 7.0$  Hz, 1H, 7'-H), 1.37 (t,  $J = 7.0$  Hz, 1H, 8'-H);  $^{13}\text{C}$  NMR, DEPT-135, HSQC, HMBC (101 MHz,  $\text{DMSO-}d_6$ ):  $\delta$  (ppm) = 181.7 (4), 165.1 (7), 163.6 (2), 161.4 (5), 157.4 (9), 151.2 (4'), 147.2 (3'), 121.4 (1'), 120.3 (6'), 115.9 (5'), 111.4 (2'), 103.4 (10), 103.1 (3), 99.0 (6), 94.2 (8), 64.2 (7'), 14.7 (8').

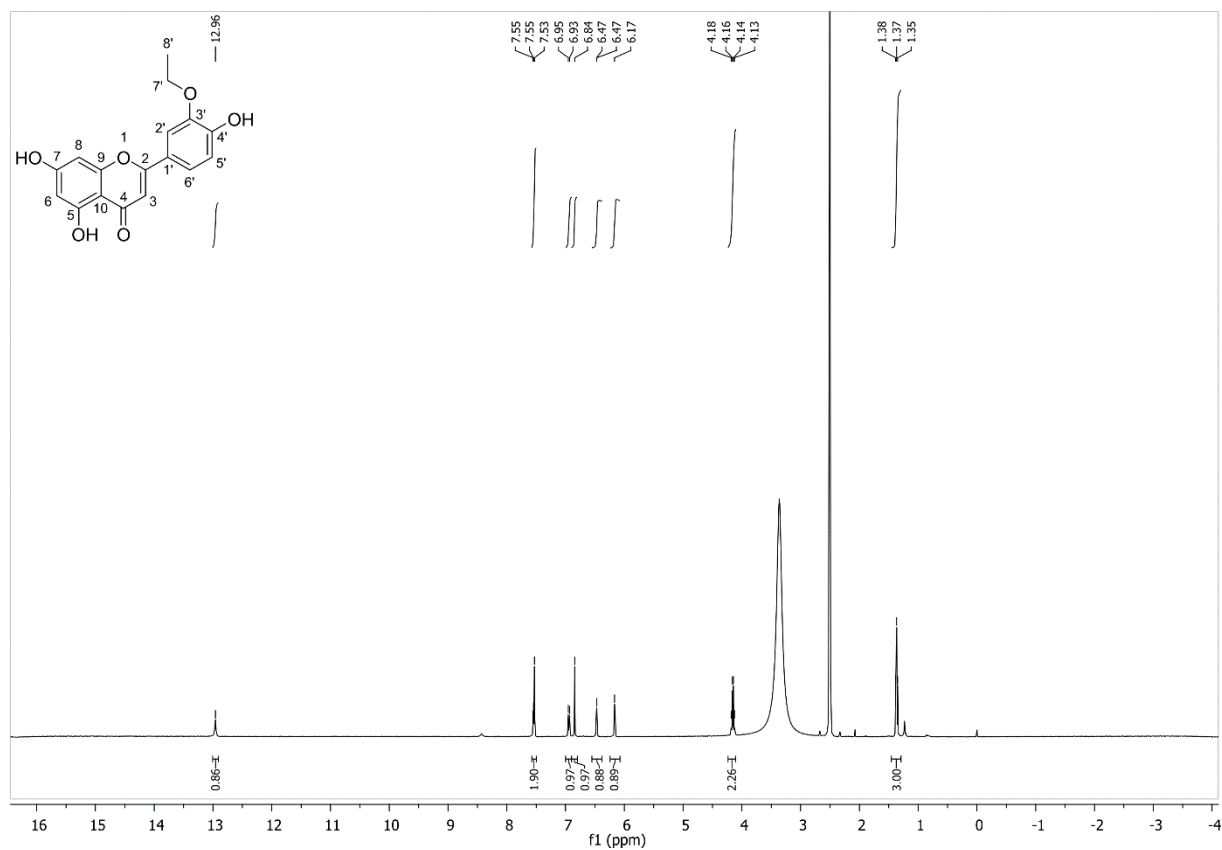

**Figure S12.**  $^1\text{H}$  NMR spectrum of 3'-O-ethyl-luteolin (6).

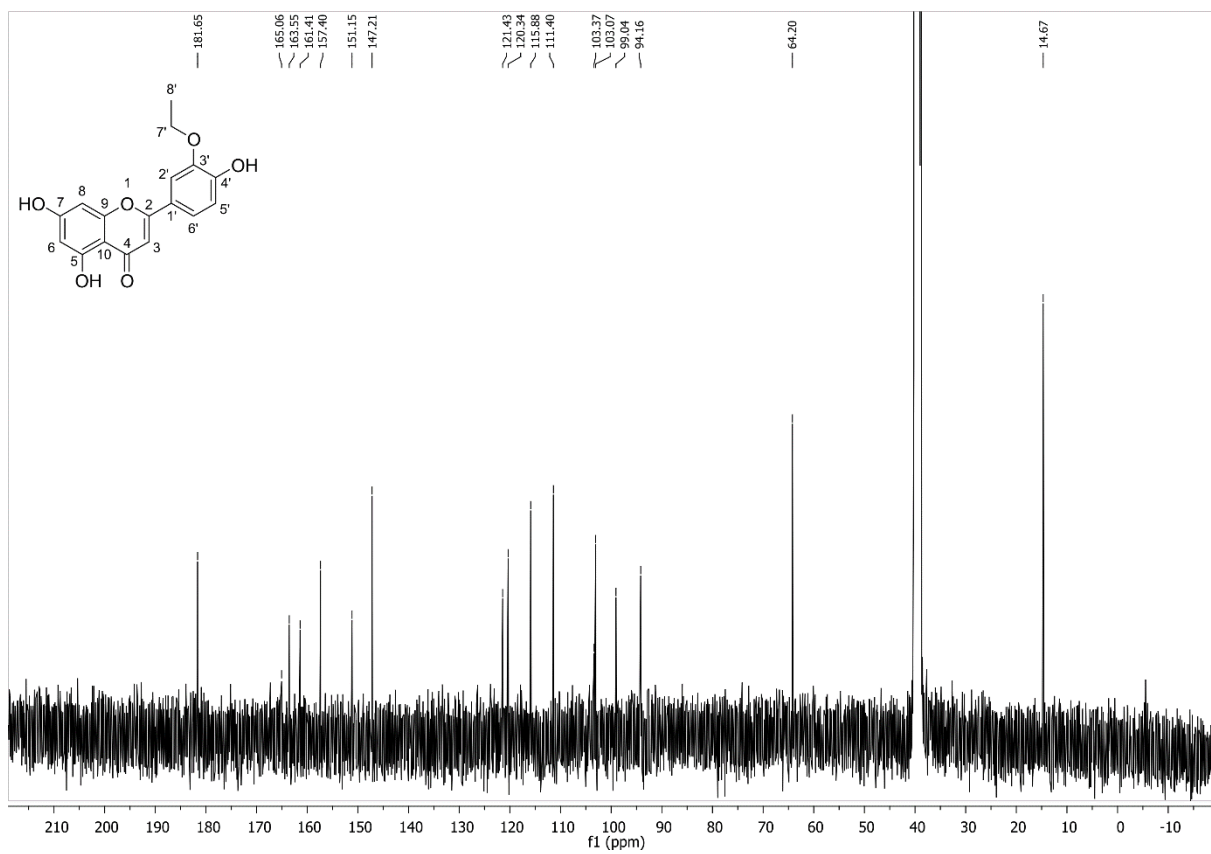

Figure S13. <sup>13</sup>C NMR spectrum of 3'-O-ethyluteolin (6).

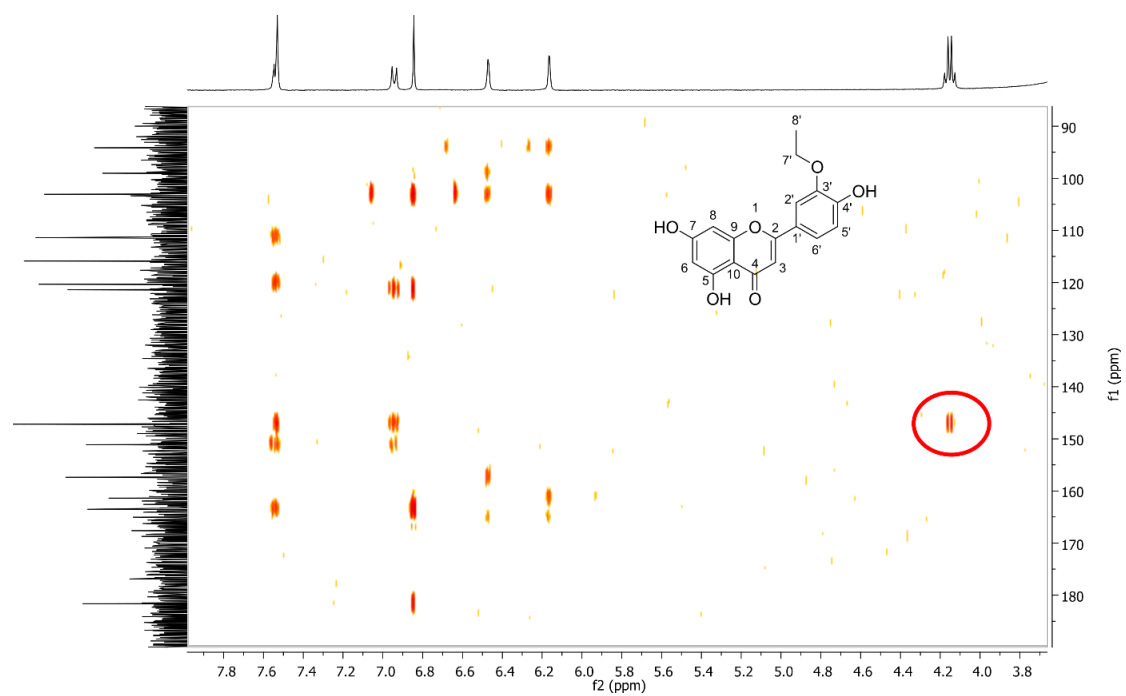

**Figure S14.** HMBC spectrum of 3'-O-ethylcatechol (**6**). The signal that defines the regioisomer is highlighted.

**4-allyloxy-3-hydroxybenzaldehyde (8).**  $^1\text{H}$  NMR, H,H-COSY (400 MHz,  $\text{DMSO-}d_6$ ):  $\delta$  (ppm) = 9.77 (s, 1H, 7-H), 7.37 (dd,  $J$  = 8.3, 1.8 Hz, 1H, 6-H), 7.28 (d,  $J$  = 1.8 Hz, 1H, 2-H), 7.11 (d,  $J$  = 8.3 Hz, 1H, 5-H), 6.12–6.00 (m, 1H, 9-H), 5.44 (dd,  $J$  = 17.3, 1.6 Hz, 1H, 10- $\text{H}_a$ ), 5.29 (dd,  $J$  = 10.5, 1.5 Hz, 1H, 10- $\text{H}_b$ ), 4.68 (d,  $J$  = 5.2 Hz, 2H, 8-H);  $^{13}\text{C}$  NMR, DEPT-135, HSQC, HMBC (101 MHz,  $\text{DMSO-}d_6$ ):  $\delta$  (ppm) = 191.5 (7), 152.2 (4), 147.3 (3), 133.3 (9), 130.0 (1), 124.1 (6), 117.9 (10), 113.9 (2), 113.0 (5), 68.9 (8).

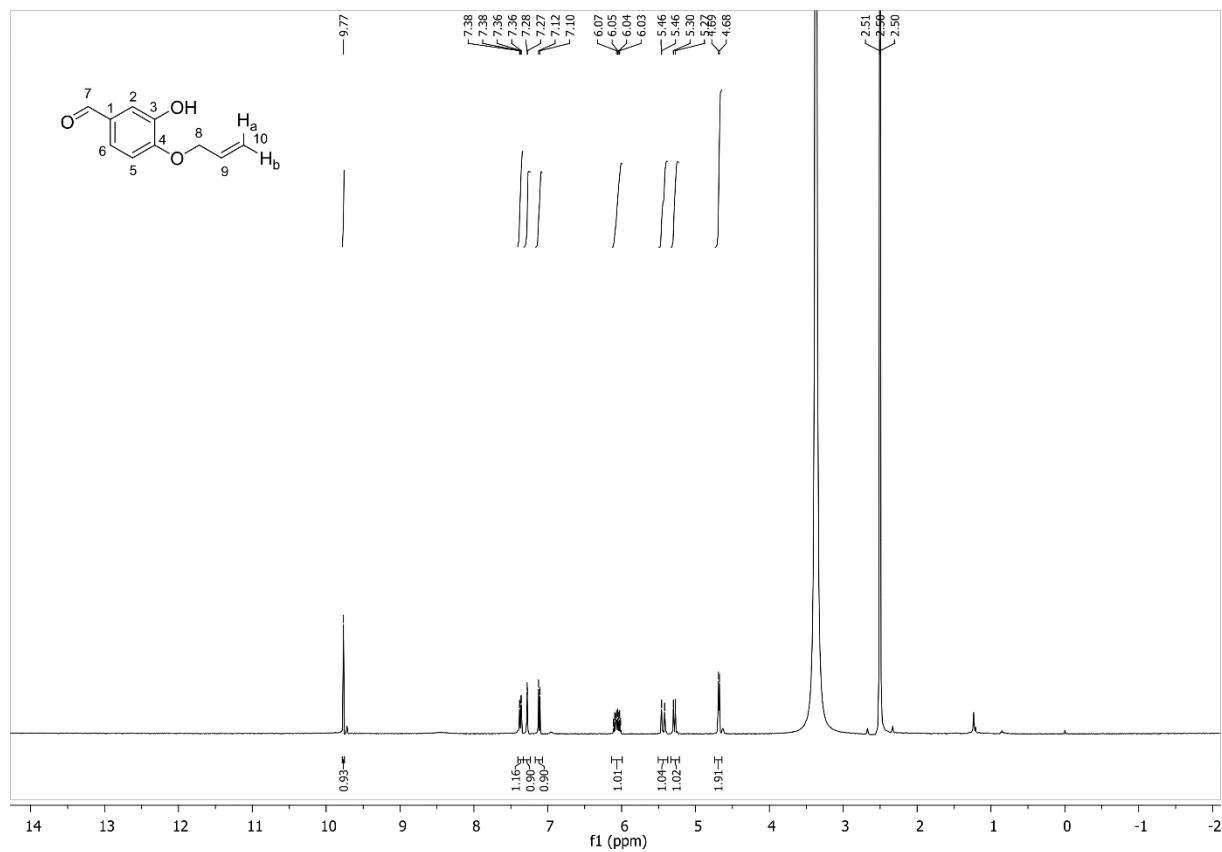

**Figure S15.**  $^1\text{H}$  NMR spectrum of 4-allyloxy-3-hydroxybenzaldehyde (8).

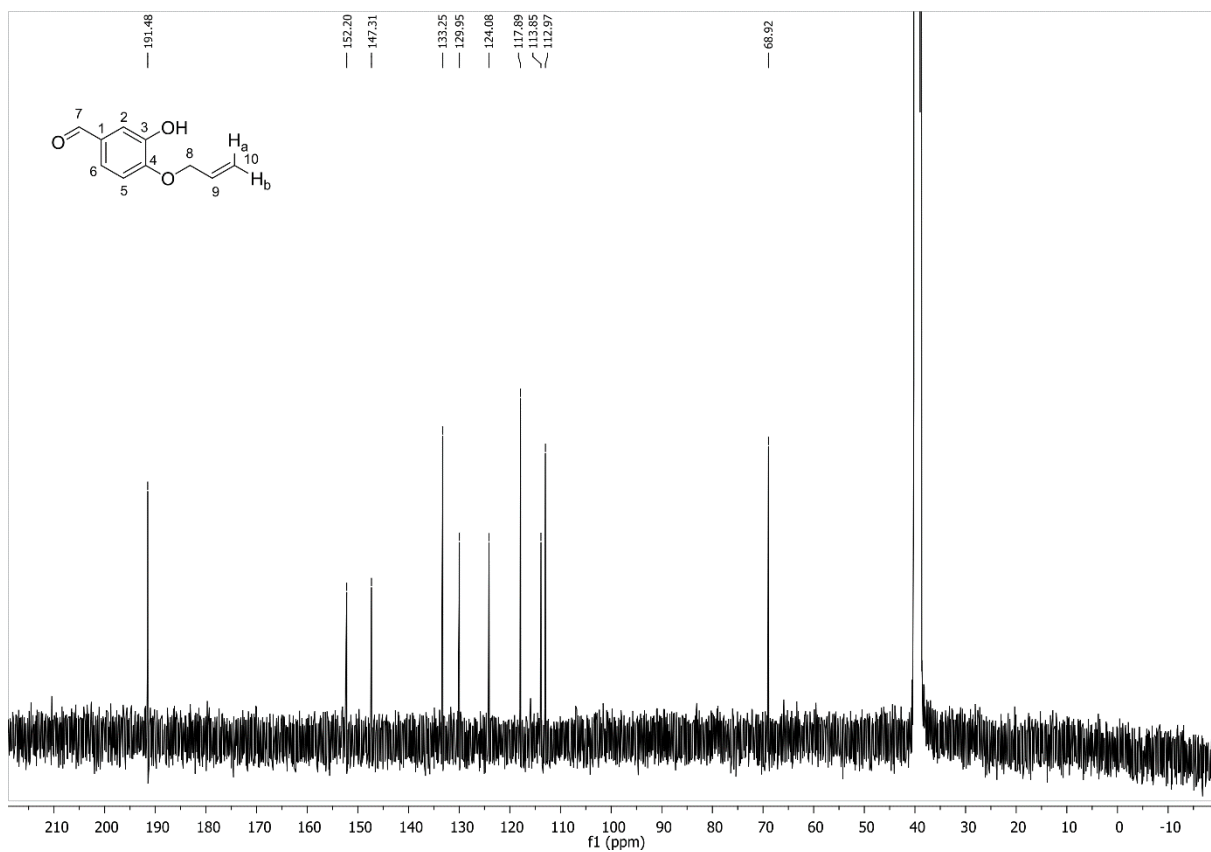

**Figure S16.**  $^{13}\text{C}$  NMR spectrum of 4-allyloxy-3-hydroxybenzaldehyde (**8**).

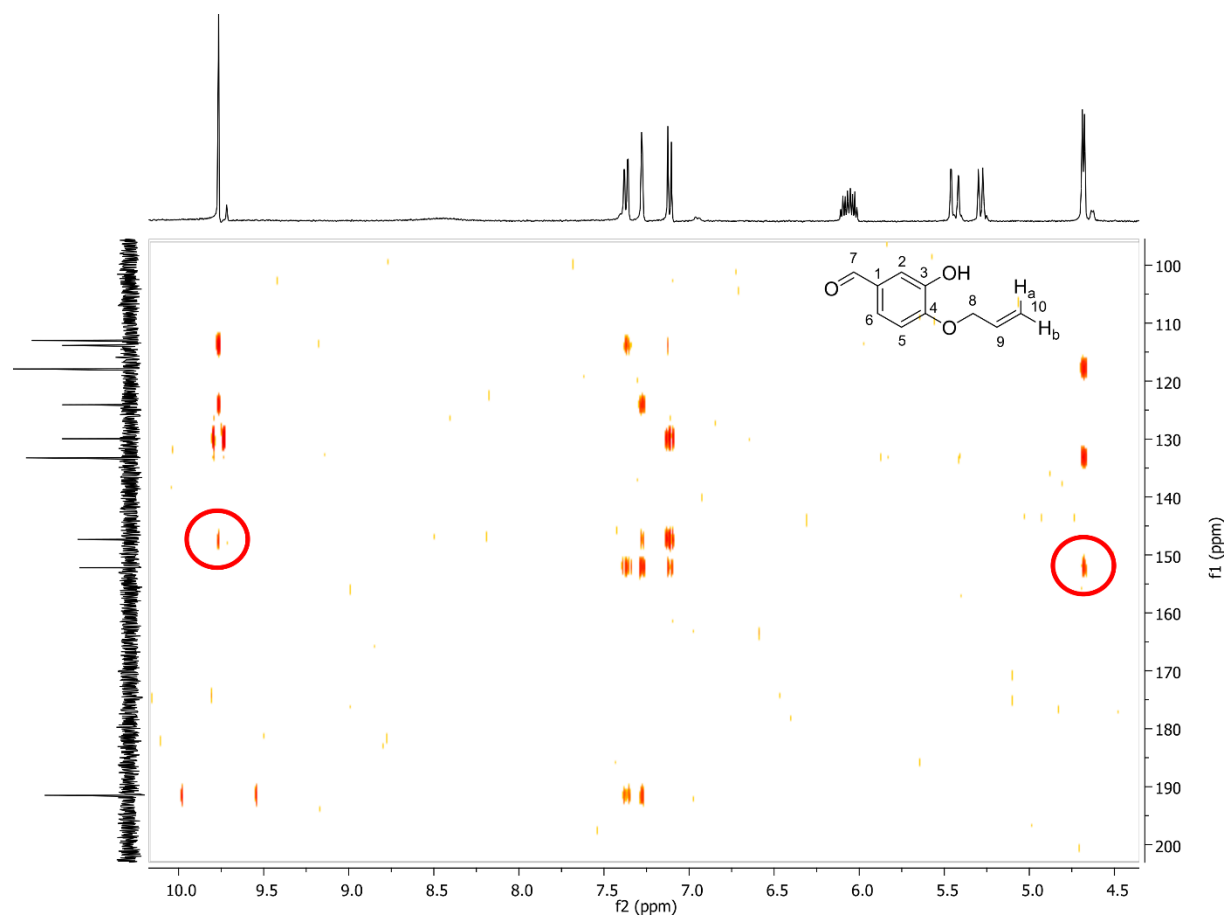

**Figure S17.** HMBC spectrum of 4-allyloxy-3-hydroxybenzaldehyde (**8**). Signals that define the regioisomer are highlighted.

**S-propyl homocysteine (3).**  $^1\text{H}$  NMR, H,H-COSY (400 MHz,  $\text{D}_2\text{O}$ ):  $\delta$  (ppm) = 8.36 (s, 2H, 2-H, 8-H), 6.07 (d,  $J = 3.7$  Hz, 1H, 1'-H), 4.82–4.70 (m, 1H, 2'-H), 4.51 (pseudo-t,  $J = 5.8$  Hz, 1H, 3'-H), 4.48–4.39 (m, 1H, 4'-H), 3.99–3.89 (m, 1H,  $\text{H}_\alpha$ ), 3.88–3.79 (m, 2H, 5'-H), 3.62–3.38 (m, 2H,  $\text{H}_\gamma$ ), 3.36–3.26 (m, 2H, 1''-H), 2.39–2.20 (m, 2H,  $\text{H}_\beta$ ), 1.78–1.64 (m, 2H, 2''-H), 0.94–0.80 (m, 3H, 3''-H);  $^{13}\text{C}$  NMR, DEPT-135, HSQC, HMBC (101 MHz,  $\text{D}_2\text{O}$ ):  $\delta$  (ppm) = 170.7 (COOH), 150.0 (6), 148.0 (4), 144.6 (2), 143.6 + 143.5 (8), 119.3 (5), 90.0 (1'), 78.6 + 78.5 (4'), 73.1 + 73.0 (2'), 72.8 (3'), 51.5 (5'), 42.7 + 42.0 (1''), 41.7 ( $\alpha$ ), 36.3 + 36.2 ( $\gamma$ ), 25.1 + 25.0 ( $\beta$ ), 17.5 + 17.3 (2''), 11.9 (3'').

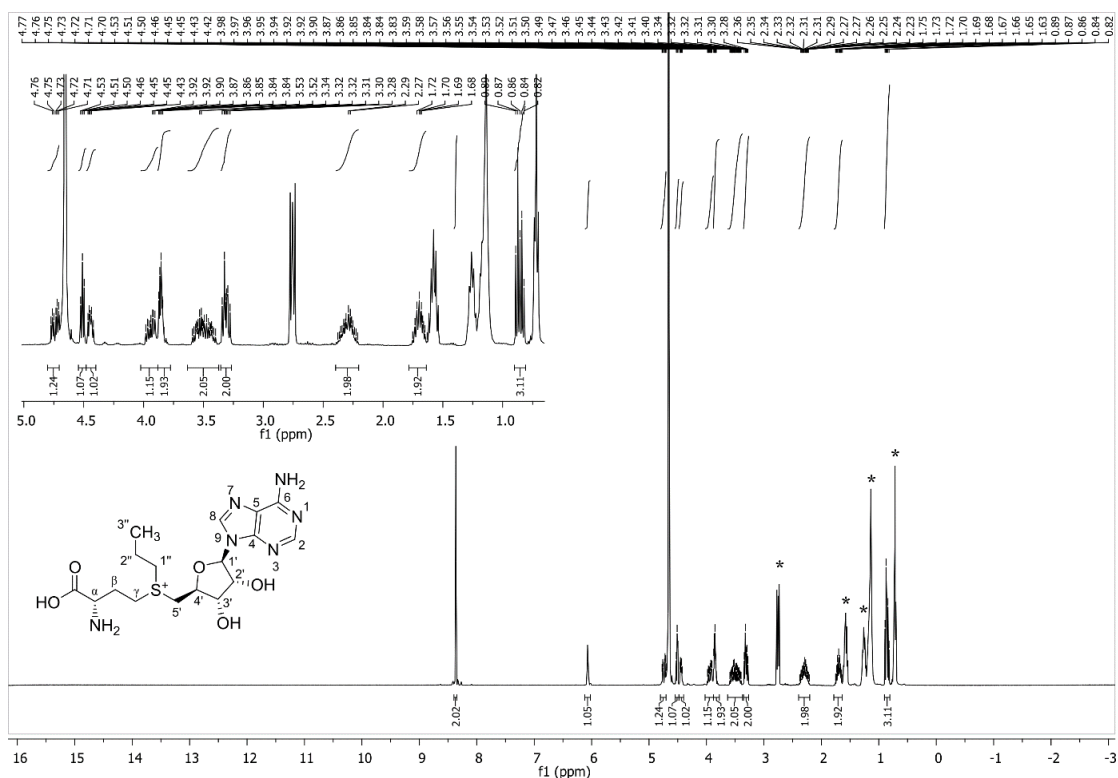

**Figure S18.**  $^1\text{H}$  NMR spectrum of SAP (3) in the form of heptane sulfonate salt. Signals derived from heptane sulfonate are assigned asterisks.

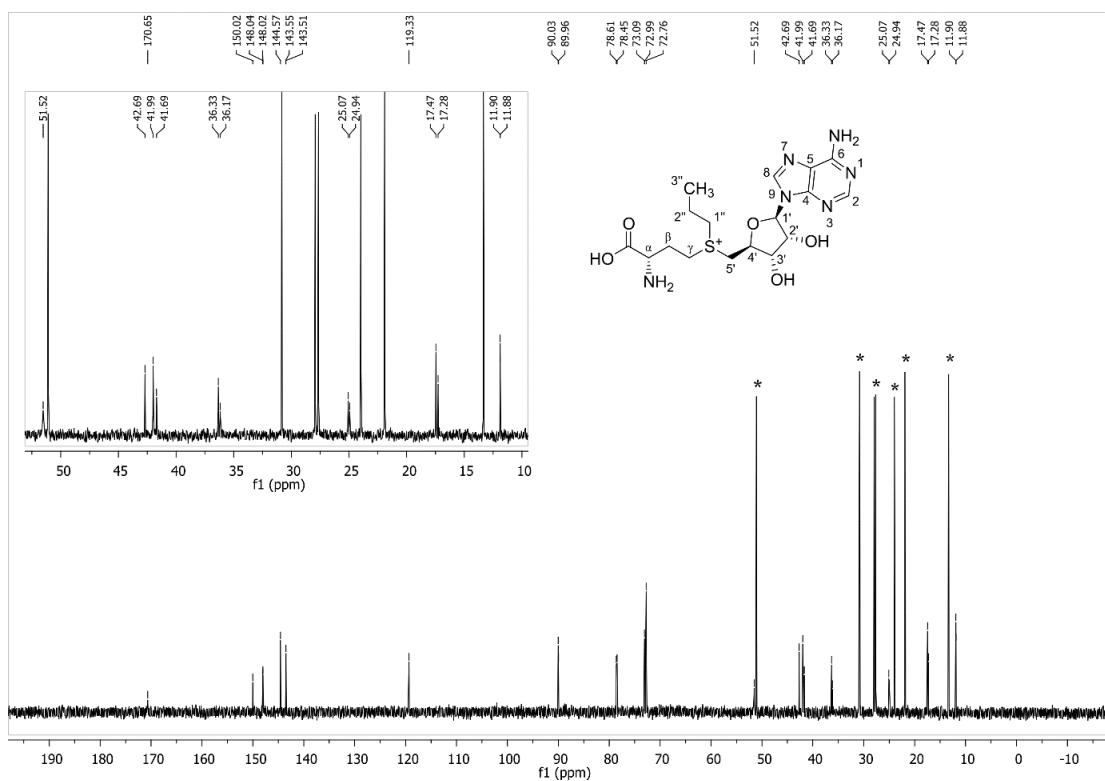

**Figure S19.** <sup>13</sup>C NMR spectrum of SAP (3) in the form of heptane sulfonate salt. Signals derived from heptane sulfonate are assigned asterisks.



## Experimental procedures

### Materials

Chemical reagents were purchased from Sigma Aldrich (Darmstadt, Germany), Alfa Aesar (Kandel, Germany), Fluorochem (Hadfield, UK), and Merck (Darmstadt, Germany), and were at least 95% pure. Reagents and solvents used for HPLC were purchased from Carl Roth GmbH (Karlsruhe, Germany) and VWR (Darmstadt, Germany), and were of HPLC grade. Molecular biology enzymes and kits were purchased from New England Biolabs (Ipswich, MA, US) unless otherwise stated. Oligonucleotides were purchased from Thermo Fisher Scientific (Hennigsdorf, Germany).

### Method S1 Genes, protein expression, and mutagenesis

#### Method S1.1 Expression vectors

DNA sequences encoding the soluble form of *Homo sapiens* catechol *O*-methyltransferase (COMT) and the halide methyltransferases from *Arabidopsis thaliana* (AtHMT), *Chloracidobacterium thermophilum* (CtHMT), and *Raphanus sativus* (RSHMT) were codon-optimized for expression in *Escherichia coli*. Genes were synthesized and cloned into pET-28a(+) or pET-28b(+) by BioCat GmbH (Heidelberg, Germany). The resulting constructs encoded either N- or C-terminal His<sub>6</sub>-tags (amino acid sequences for all proteins are given in the section *Protein sequences*). The empty pET-28a(+) vector (Novagen<sup>®</sup>) was purchased from Merck (Darmstadt, Germany). The C-terminally His<sub>6</sub>-tagged T133M-Y326L mutant of *Clarkia breweri* isoeugenol *O*-methyltransferase (IeOMT) in pET-21b(+) was described in our previous work.<sup>[2]</sup> All HMTs and MTs, as well as the empty pET-28a vector, were transformed into chemically competent *E. coli* BL21 Δmtn (DE3) cells (Method S1.3) using a standard heat-shock protocol.

#### Method S1.2 Site-saturation mutagenesis

Saturation mutagenesis was performed using mutagenesis PCR. Degenerate (NNK) oligonucleotides (Table S6) and the wild-type AtHMT-encoding plasmid (DNA sequence is given below Table S6) were used. PCRs contained 1 x *Pfu* buffer, 2% DMSO, 200 nM each of forward and reverse primers, dNTPs (250 μM each), 0.2 ng/μl of template DNA (pET-28a-AtHMT), and 0.05 U/μl of *Pfu* polymerase (Roboklon GmbH, Berlin, Germany). After initial denaturation for 1 min at 95 °C, 18 cycles of denaturation at 95 °C for 30 s, annealing at

60 °C for 1 min, and extension at 68 °C for 6.5 min were performed, followed by a final extension at 68 °C for 13 min. PCR products were treated twice by DpnI digestion to ensure complete removal of the template DNA.<sup>[3]</sup> The DpnI-digested PCR mixtures (5 µl) were used for heat shock transformation of chemically competent *E. coli* BL21 Δmtn (DE3) cells. Transformations were plated on LB Miller agar containing 50 µg/ml kanamycin and incubated overnight at 37 °C.

**Table S6.** Sequences of the degenerate (NNK) oligonucleotides used for site-saturation mutagenesis.

| Primer           | Sequence (5'-3')                                                   |
|------------------|--------------------------------------------------------------------|
| P20 NNK forward  | ggcggtaatgtgattccgacc <b>nnk</b> gaagaagttgcaacctttctg             |
| P20 NNK reverse  | cagaaaggtgcaacttct <b>mnng</b> gtcggaatcacattaccgcc                |
| V23 NNK forward  | atgtgattccgaccccgaaga <b>annk</b> gcaacctttctgcataaaac             |
| V23 NNK reverse  | gtttatgcagaaaggtg <b>mnn</b> ttctccgggtcggaatcacat                 |
| L27 NNK forward  | cccgaagaagttgcaacct <b>nnk</b> cataaaaccgtgaagaaggcg               |
| L27 NNK reverse  | cgcttctcaacggtttat <b>mn</b> naaggtgcaacttctccggg                  |
| W36 NNK forward  | gcataaaaccgtgaagaaggcg <b>tnnk</b> gaaaaatgctgggaagaagaatta        |
| W36 NNK reverse  | taatttcttctccagcatttt <b>mn</b> naccgccttctcaacggtttatgc           |
| W47 NNK forward  | ggaagaagaattacccc <b>nnk</b> gatcagggtcgcaaccc                     |
| W47 NNK reverse  | gggtgcacgacctgat <b>mnn</b> cgggtaatttcttctcc                      |
| Y139 NNK forward | gtccgaccgaactgttgatctgattttgat <b>nnk</b> gtgttctctgtgcaat         |
| Y139 NNK reverse | attgcacagaagaacac <b>mnn</b> atcaaaaatcagatcaaacagttcggtcgac       |
| V140 NNK forward | cgtcgaccgaactgttgatctgattttgattat <b>nnk</b> ttctctgtgcaatcgaac    |
| V140 NNK reverse | gttcgattgcacagaaga <b>mnn</b> nataatcaaaaatcagatcaaacagttcggtcgacg |
| C143 NNK forward | ctgattttgattatgtgttct <b>nnk</b> gcaatcgaaccggaatgcgccc            |
| C143 NNK reverse | ggcgcatctccggttcgattg <b>mnn</b> gaagaacacataatcaaaaatcag          |
| Y172 NNK forward | ggcgaactgattaccctgat <b>nnk</b> ccgattaccgatcatgttgg               |
| Y172 NNK reverse | accaacatgatcggtaatcg <b>mnn</b> catcagggtaatcagttcgcc              |
| R214 NNK forward | aatccgatgccattccgacc <b>nnk</b> aaaggtaaagaaaaactgggc              |
| R214 NNK reverse | gcccagtttctttacct <b>mnng</b> gtcggaatggcatgctggatt                |

### DNA sequence of the wild-type *AfHMT* template used for mutagenesis

ATGGGCAGTAGTCATCATCATCACCATAGTAGTGGTCTGGTGCCGCGCGGCAGTCATATGGCCGAAGAACAGCAGAATAGTGA  
 TCAGAGTAATGGCGGTAATGTGATTCCGACCCCGGAAGAAGTTGCAACCTTTCTGCATAAAACCGTTGAAGAAGCCGGTTGGGAAA  
 AATGCTGGGAAGAAGAAATACCCCGTGGGATCAGGGTCGTGCAACCCCGTGATTGTGCATCTGGTGGATACCAGCAGCCTGCCG  
 CTGGGTCCGCGCTTAGTGCCGGTTGCGGTGGTGGTCATGATGTGGTTGCCATGGCCAGTCCGGAACGCTTTGTTGTTGGTCTGGA  
 TATTAGTGAAGCGCCCTGGCAAAAGCCAATGAAACCTATGGTAGCAGTCCGAAAGCAGAATATTTTAGCTTTGTTAAAGAGGATG  
 TGTTACCTGGCGTCCGACCGAAGTGTGATCTGATTTTTGATTATGTGTTCTTCTGTGCAATCGAACCGGAAATGCGCCCGGCA  
 TGGGCAAAAAGTATGTATGAACTGCTGAAACCGGATGGCGAACTGATTACCCTGATGTATCCGATTACCGATCATGTTGGTGGCCC  
 GCCGTATAAAGTTGATGTTAGCACCTTTGAAGAAGTGTGGTGCCGATTGGCTTTAAAGCCGTGAGCGTGGAAGAAAATCCGCATG  
 CCATTCCGACCCGTAAAGGTAAAGAAAACCTGGGCCGCTGGAAAAAGATTAATTA

### **Method S1.3 Construction of the MTA/SAH nucleosidase knockout *E. coli* BL21(DE3) strain**

As reported by Liao and Seebeck, the 5'-methylthioadenosine/S-adenosyl homocysteine (MTA/SAH) nucleosidase from *E. coli* BL21(DE3) can degrade the substrate SAH to adenine and the enzyme cannot be completely removed by immobilized metal-affinity chromatography and size exclusion chromatography.<sup>[1]</sup> Thus, an MTA/SAH nucleosidase knockout strain of *E. coli* BL21(DE3), named *E. coli* BL21  $\Delta$ mtn (DE3), was constructed for the expression of HMTs and MTs. The *E. coli* BL21  $\Delta$ mtn (DE3) strain was constructed using a previously developed two-plasmid-based CRISPR-Cas9 system.<sup>[4]</sup> The two key plasmids pCas and pTargetF (plasmid IDs #62225 and #62226) were purchased from Addgene (Watertown, MA, US). The pTarget-dmtn plasmid was first constructed by engineering the flanking sequence of the *mtn* gene by assembly of three DNA fragments, the mtn-Up fragment and the mtn-Down fragment, amplified from the *E. coli* genome using the corresponding primers (Table S7), and the pTarget fragment amplified from the pTargetF plasmid using the corresponding primers (Table S7). The three fragments were assembled using the SLiCE cloning method.<sup>[5]</sup> Next, the gRNA was introduced with the dmtn-gRNA primers using the Q5 Site-Directed Mutagenesis Kit from New England Biolabs. The resulting pTarget-dmtn plasmid was sequenced to confirm introduction of the gRNA and the flanking sequence of the *mtn* gene. The *E. coli* BL21  $\Delta$ mtn (DE3) strain was constructed by using pCas and pTarget-dmtn according to a previously developed procedure,<sup>[4]</sup> briefly outlined here. 1) Transform the pCas plasmid into chemically competent *E. coli* BL21(DE3) cells following a standard heat-shock protocol. 2) Prepare electrocompetent cells of *E. coli* BL21(DE3) pCas with the arabinose-inducible  $\lambda$ -Red system. 3) Introduce the pTarget-dmtn plasmid by electroporation. 4) Select on LB agar plates containing 50  $\mu$ g/ml kanamycin (for pCas) and 50  $\mu$ g/ml streptomycin (for pTarget-dmtn). 5) Perform colony PCR for genotyping the colonies. 6) Sequentially cure the plasmid pTarget-dmtn (by adding 1 mM IPTG) and pCas (by culturing at 37°C for 12 h). The resulting *E. coli* BL21  $\Delta$ mtn (DE3) strain was confirmed by PCR amplification and sequencing the genomic DNA flanking the *mtn* gene. Chemically competent *E. coli* BL21  $\Delta$ mtn (DE3) cells were prepared using the Hanahan method.<sup>[6]</sup>

**Table S7.** Oligonucleotides used for construction of the MTA/SAH nucleosidase knockout strain *E. coli* BL21  $\Delta$ mtn (DE3).

| Primer            | Sequence (5'-3')                           |
|-------------------|--------------------------------------------|
| mtn-Up-forward    | gagtcgacctgcagaagcttgaaccagtcattatcgctgc   |
| mtn-Up-reverse    | cagtgacttaagatttactcgcgataagccc            |
| mtn-Down-forward  | gagtaaacttaagtcactgttcagggcgct             |
| mtn-Down-reverse  | gagctgcacatgaactcgaggcggattaatgccgaattgcag |
| pTarget-forward   | ctcgagttcatgtgcagctc                       |
| pTarget-reverse   | aagcttctgcaggtcgactc                       |
| dmtn-gRNA-forward | tctgttggtcgtttagagctagaaatagcaagtt         |
| dmtn-gRNA-reverse | accgttgatgactagtattatacctaggactgagc        |

## **Method S2 High-throughput screening**

### **Method S2.1 Expression of variants in the NNK libraries**

For each NNK library, 96 colonies were picked into 96-well microtiter plates filled with 150  $\mu$ l of lysogeny broth (LB) containing 50  $\mu$ g/ml kanamycin and grown overnight at 37°C, shaking at 700 rpm in an MTP shaker (Edmund Bühler GmbH, Bodelshausen, Germany). Terrific Broth (1 ml in 96-deepwell plates) containing 50  $\mu$ g/ml kanamycin and 100  $\mu$ M of isopropyl  $\beta$ -D-1-thiogalactopyranoside (IPTG) were inoculated with 50  $\mu$ l of the pre-cultures and incubated at 30°C (900 rpm) for 24 h. The remaining pre-cultures were mixed with glycerol to a final concentration of 40% (v/v) and stored at -80 °C. The cells grown in deep-well plates were collected by centrifugation at 4,000 g for 20 min (4 °C). Cell pellets were resuspended in 250  $\mu$ l of lysis buffer (1 mg/ml lysozyme, 10  $\mu$ g/ml DNase, and 0.1  $\times$  BugBuster<sup>®</sup> Protein Extraction Reagent (Novagen<sup>®</sup>) in 50 mM sodium phosphate (pH 7.5) by shaking at 700 rpm (30°C) for 2 h. Cell debris was removed by centrifugation at 4,000 g for 20 min (4°C) and the resulting supernatant was used for HMT assays.

### **Method S2.2 HMT assay and general screening workflow**

Libraries were screened in 96-well microtiter plates. Reactions contained 1 mM SAH (1  $\mu$ l of a 100 mM stock in DMSO), 5 mM ethyl iodide (5  $\mu$ l of a 100 mM stock in DMSO) and 94  $\mu$ l of crude cell lysate, for a final assay volume of 100  $\mu$ l, and were incubated at room temperature for 30 min. Ethyl iodide stocks in DMSO were freshly prepared for each experiment to avoid hydrolysis. After the 30 min incubation, 1  $\mu$ l of each reaction mixture was added to 50  $\mu$ l of iodide assay reagent (Method S3.2) in transparent 96-well polystyrene microtiter plates. The plates were shaken immediately and then incubated at room temperature for 30 min. The production of iodide by the HMT reaction was detected by observing the color of the assay solution (Figures S2 and S4). Hits showing higher activities than the wild-type *At*HMT were cultivated from the respective glycerol stocks. Plasmid DNA was isolated (innuPREP Plasmid Mini Kit 2.0, Analytic Jena, Jena, Germany) and sent for Sanger sequencing (Eurofins Genomics Germany GmbH, Ebersberg, Germany).

## **Method S3      The iodide assay for high-throughput screening**

### **Method S3.1      Assay principle**

We developed a sensitive and convenient iodide assay based on our published HOX assay for halides.<sup>[7]</sup> The assay described here has the advantage of being very sensitive to iodide but relatively insensitive to chloride, making it ideal for screening using chloride-containing crude lysates. Iodide was first converted to hypoiodous acid (HOI) by a vanadium-dependent chloroperoxidase from *Curvularia inaequalis* (CVCPO, Method S3.4). The CVCPO uses hydrogen peroxide to oxidize iodide to HOI under mild conditions. The bleach HOI is detected by oxidation of the chromogen 3,3',5,5'-tetramethylbenzidine (TMB).<sup>[8]</sup> TMB is first converted to the one-electron oxidized cation radical which is in equilibrium with the TMB-diimine complex (blue,  $\lambda_{\max}$  = 570 nm) and finally to the two-electron oxidized diimine product (orange,  $\lambda_{\max}$  = 460 nm) (Figure S2a).<sup>[8a]</sup> In the assay setup we used, iodide concentrations from 5  $\mu$ M to 10 mM could be detected. For lower concentrations, the assay turns blue and for higher concentrations the mixture turns purple, copper, or orange (Figure S2b) and the maximum absorption shifts from 570 to 460 nm (Figure S2c). We used only 1  $\mu$ l of sample in a 50  $\mu$ l iodide assay so much less than 5  $\mu$ M of iodide could be detected by adjusting the sample volume. Importantly, the iodide assay is not sensitive to millimolar concentrations of chloride (Figure S2b).

### **Method S3.2 Preparation of the assay reagent**

An assay solution containing 1.37 U/ml *CVCPO*, 25 mM TMB, 2 mM hydrogen peroxide, and 1 mM sodium orthovanadate in 20 mM phosphate (pH 6.0) was used for preliminary experiments. However, to simplify the assay setup for high-throughput screening, we used a commercially available premixed solution of TMB and H<sub>2</sub>O<sub>2</sub> in a mildly acidic buffer (Liquid Substrate System for Membranes; Sigma Aldrich; Catalog Number T0565). The concentrations of the individual components in this proprietary mixture are unknown but the commercial solution was suitable for our purposes. We prepared our iodide assay reagent by adding recombinantly expressed *CVCPO*, to a final concentration of 1.37 U/ml, to the Liquid Substrate System. Expression and purification of the *CVCPO* is described in Method S3.4.

### **Method S3.3 Iodide quantification and calibration curves**

For the quantification of iodide, the iodide assay was carried out in transparent 384-well polystyrene microtiter plates at room temperature. Absorbance measurements were performed using a Tecan Infinite M200PRO3 Plate Reader (Tecan, Männedorf, Switzerland). Samples or standards (1  $\mu$ l) were added to iodide assay reagent (50  $\mu$ l) and the initial rate of change in absorbance at 570 nm determined. The calibration curve for iodide was determined using potassium iodide (KI) solutions ranging from 5  $\mu$ M to 400  $\mu$ M. All reactions were performed in triplicate. The rate of change in absorbance at 570 nm ( $v(A_{570\text{nm}}/s)$ ) showed a linear relationship to iodide concentration from 5  $\mu$ M to 400  $\mu$ M (Figure S3a).

### **Method S3.4 Expression, purification, and activity determination of *CVCPO***

The *CVCPO* was expressed from the pBAD-VCPO plasmid in *E. coli* TOP10 as previously described.<sup>[7]</sup> In short, a culture of 10 ml of LB medium containing 100  $\mu$ g/ml ampicillin was inoculated with a single colony from an LB agar plate containing 100  $\mu$ g/ml ampicillin and incubated overnight at 37°C. The overnight culture was used to inoculate a 1 L culture of LB medium containing 100  $\mu$ g/ml ampicillin. The culture was incubated at 37°C (180 rpm) until OD<sub>600</sub> reached ~0.5. Expression was then induced by the addition of 0.02% L-arabinose, followed by incubation at 25°C for 24 h. Cells were harvested by centrifugation at 4500 *g* for 30 min (4°C) and resuspended in ice-cold lysis buffer (1 ml per gram of cells). The lysis buffer was composed of 50 mM Tris-H<sub>2</sub>SO<sub>4</sub> (pH 8.1) containing 2 mg/ml lysozyme, 1 mg/ml DNaseI, and cOmplete™ protease inhibitor cocktail (Roche, Mannheim, Germany). The resuspended cells were lysed by sonication on ice (three cycles of 5 min; 50% pulse and 50% power) using a SONOPULS HD 2070 (BANDELIN electronic GmbH & Co. KG, Berlin, Germany). The crude

lysate was clarified at 4 °C by centrifugation at 10,000 g for 1 h. The clarified lysate was transferred to a new tube, thoroughly mixed with an equal volume of isopropanol, and incubated on ice for 20 min. Precipitated proteins were removed by centrifugation at 10,000 g for 30 min (4°C). The CVCPO was then purified by chromatography on a 5 ml DEAE Sephacel column equilibrated with 50 mM Tris-H<sub>2</sub>SO<sub>4</sub> (pH 8.1). The column was washed with 25 ml of 50 mM Tris-H<sub>2</sub>SO<sub>4</sub> (pH 8.1) and then with 25 ml of the same buffer containing 100 mM sodium chloride. Protein was eluted from the column using 50 mM Tris-H<sub>2</sub>SO<sub>4</sub> (pH 8.1) containing 1 M sodium chloride. The eluate (30 ml) was dialyzed three times (twice for 4 h and then overnight) against 4.5 L of 50 mM sodium phosphate (pH 8.0) supplemented with 100 μM sodium orthovanadate. The orthovanadate converts the apoenzyme to the active vanadium-bound holoenzyme. Protein concentration was determined by measuring absorbance at 280 nm using a NanoDrop™ (Thermo Fisher, Hennigsdorf, Germany). The specific activity of CVCPO was determined using the monochlorodimedone assay. Bromination of monochlorodimedone results in a decrease in absorbance at 290 nm ( $\Delta\epsilon = 20,000 \text{ M}^{-1}\text{cm}^{-1}$ ). Reactions (600 μl) containing 42 μM monochlorodimedone, 100 μM bromide, 8.8 mM H<sub>2</sub>O<sub>2</sub>, and 1 mM orthovanadate in 20 mM phosphate (pH 6.0) were initiated by addition of 10 μl (4.5 μg) of purified CVCPO. The decrease in absorbance at 290 nm was monitored using a 1 cm-pathlength quartz cuvette and a JASCO V-550 spectrophotometer (JASCO, Easton, MD, US). Specific activity was expressed as μmol monochlorodimedone brominated/min/(mg CVCPO).

## **Method S4 Characterization of purified HMTs**

### **Method S4.1 Expression and purification of HMTs and MTs**

All HMTs and MTs were transformed into chemically competent *E. coli* BL21 Δmtn (DE3) cells for protein expression. Pre-cultures (5 ml LB medium containing 50 μg/ml kanamycin for pET-28 plasmids or 100 μg/ml ampicillin for pET-21 plasmids) were inoculated with single colonies and incubated overnight at 37°C. For the *At*HMT mutants, pre-cultures were inoculated from glycerol stocks of the NNK libraries (2% (v/v)). The cells were grown in Terrific Broth (TB) containing antibiotics (50 μg/ml kanamycin for pET-28 plasmids or 100 μg/ml ampicillin for pET-21 plasmids) at 37°C for about 2 h until OD<sub>600</sub> reached ~0.7. Cultures were then cooled to 20°C before IPTG was added to a final concentration of 200 μM. Cultures were then incubated at 20°C for another 20 h. Cells were harvested by centrifugation at 10,000 g at 4°C for 10 min. Cell pellets were resuspended in lysis buffer (20 mM sodium phosphate, 500 mM sodium chloride, and 20 mM imidazole, pH 7.5) and lysed by sonication on ice (as described in Method S3.4). Lysates were clarified by centrifugation at 10,000 g and 4°C for 1 h. The His<sub>6</sub>-tagged recombinant proteins were purified by immobilized metal-affinity chromatography as follows. The clarified lysates were loaded onto 2 ml of Roti®garose-His/Co Beads (Carl Roth, Karlsruhe,



Germany) equilibrated with lysis buffer. After incubation on ice for 15 min, the flow-through was discarded and weakly bound proteins were removed by washing the resin with lysis buffer. The target proteins were then eluted with elution buffer (20 mM sodium phosphate, 500 mM sodium chloride, and 200 mM imidazole, pH 7.5) and desalted using PD-10 desalting columns (GE healthcare, Amersham, UK) equilibrated with storage buffer. Storage buffer was chloride-free 50 mM sodium phosphate (pH 7.5) prepared by dissolving 0.041 mol Na<sub>2</sub>HPO<sub>4</sub> and 0.0094 mol NaH<sub>2</sub>PO<sub>4</sub> in 1 L of Milli-Q water. Further desalting was achieved by dilution into 40 volumes of storage buffer and concentration using 10 kDa MWCO Vivaspin™ protein concentrators (Sartorius AG, Germany, Göttingen). Protein concentrations were determined by measuring absorbance at 280 nm using a NanoDrop™ (Thermo Fisher, Hennigsdorf, Germany). Extinction coefficients (280 nm) for all proteins are given in the section *Protein sequences*. Protein purities were analyzed by SDS-PAGE.<sup>[9]</sup>

#### **Method S4.2 HMT specific activity and kinetic measurements**

HMTs and mutants were assayed using various haloalkanes. Reaction mixtures (50 µl) contained 1 mM SAH, 10 mM haloalkane, and the purified enzyme in 50 mM chloride-free sodium phosphate (pH 7.5). Reactions were incubated in an Eppendorf Thermomixer at 25°C and 1000 rpm. All haloalkane stocks in DMSO were freshly prepared before the reaction to avoid hydrolysis. Purified enzymes were added to a final concentration of 0.15 mg/ml (5.46 µM wild-type or mutant *AfHMT*) for methyl iodide assays. For other iodoalkanes, 2 mg/ml protein (72.85 µM wild-type or mutant *AfHMT*) was used. The reaction time was 10 min for methyl and ethyl iodide and 4 h (Table S1) or 16 h (Figure S7) for all other iodoalkanes. After incubation, 1 µl of reaction mixture was added to 50 µl iodide assay reagent and the iodide concentration determined as described in Method S3.3. Kinetic measurements were carried out at various concentrations of alkyl iodide while keeping the SAH concentration constant at 1 mM. Initial velocities (amount of iodide produced per minute) were fit to the Michaelis-Menten model using GraphPad Prism 6.0 (GraphPad Software Inc., San Diego, CA, US) to determine the  $k_{cat}$  and  $K_m$  values. All reactions were measured in triplicate. Rates of HMT-dependent iodide formation were corrected for autohydrolysis, which was determined for each iodoalkane at each concentration employed.

#### **Method S4.3 HPLC analysis of MT and HMT reactions**

Reactions using the purified HMTs were performed as described for the iodide assay (Method S2.2) and quenched by adding an equal volume of acetonitrile. Samples were vortexed vigorously and then centrifuged at 17,000 *g* for 10 min to remove precipitated protein.

The supernatants were transferred to HPLC sample vial inserts prior to HPLC analysis. Analyses were performed on a Hitachi Elite LaChrom system equipped with a Kinetex EVO C18 (4.6 x 250 mm column, 5  $\mu$ m particle size) reversed-phase column (Phenomenex, Torrance, CA, US). For separation of SAH, SAM, and SAM analogues, the mobile phases were (A) 10 mM sodium phosphate containing 5 mM sodium 1-heptanesulfonate (pH 3.5), and (B) acetonitrile. A gradient from 5% to 20% (B) over 10 min was followed by a gradient from 20% to 5% B over 1 min, then kept constant for 4 min. The flow rate was constant at 1 ml/min. SAH, SAM, and SAM analogues were detected at 260 nm and quantified using a SAM (J&K Chemical Ltd., China, Beijing) standard and calibration curve (Figure S3b).<sup>[10]</sup> Previously reported methods were adapted for separations of luteolin (**5**) and its ethylated product (**6**), and 3,4-dihydroxybenzaldehyde (**7**) and its propylated or allylated (**8**) products.<sup>[2, 11]</sup> A Kinetex EVO C18 (4.6 x 250 mm column, 5  $\mu$ m particle size) reversed-phase column was used. The mobile phases were 0.1% acetic acid (A) and acetonitrile (B). A gradient elution from 20% to 60% (B) over 5 min, was followed by a gradient from 60% to 20% (B) over 1 min, and then kept constant for 4 min.

## **Method S5      Preparative-scale HMT reactions**

### **Method S5.1      Preparative-scale production of SAM analogues and alkylated compounds**

Scaled-up production of ethylated luteolin (**6**), and propylated or allylated DHBA (**8**) was performed as described in Table S5. In short, 10 or 20 mg of the MT substrate, 80 mM alkyl iodide, 100  $\mu$ M SAH, MT, and HMT were shaken (1200 rpm) in HPLC vials at 25°C. Subsequently, the reaction mixtures were extracted three times with an equal volume of ethyl acetate. Ethyl acetate was then removed by rotary evaporation and the residues dissolved in hexadeuterodimethyl sulfoxide (DMSO-*d*<sub>6</sub>) for NMR spectroscopy. The alkylated products were analyzed by HPLC (Method S4.3) and then purified by preparative HPLC (Method S5.2).

Preparative-scale production of SAE, SAP, and SAA started with 15 mg SAH (10 mM), 80 mM of the corresponding alkyl iodide, and purified V140T-AtHMT (Table S4). Reactions (3.9 ml of each) were performed in HPLC vials at 25°C, with shaking at 1200 rpm, for 14 to 24 h. Subsequently, the reaction mixtures were extracted three times with an equal volume of diethyl ether to remove the remaining alkyl iodides and to precipitate protein. The supernatants containing the SAM analogues were analyzed by analytical HPLC (Method S4.3) and then purified by preparative HPLC (Method S5.2).

## **Method S5.2      Preparative HPLC purification**

Prior to purification, SAM analogues and alkylated compounds were analyzed using an analytical LiChrospher® 100 RP-18 (5 µm) LiChroCART® (250×4 mm, Merck) column. The preparative column was a LiChrospher® 100 RP-18 (5 µm) Hibar® RT (250×25 mm, Merck). Both HPLCs were equipped with Shimadzu devices CBM-20A, LC-20A P, SIL-20A, FRC-10A, and an SPD 20A UV/Vis detector. The mobile phases and gradient elution methods were the same as for measurements on the Kinetex EVO C18 column (Method S4.3) and the flow rate was 32 ml/min. Product fractions were collected and dried using a rotary evaporator, lyophilized, and dissolved in DMSO-*d*<sub>6</sub> (for **6** and **8**) or D<sub>2</sub>O (for **3**) for NMR spectroscopy (Method S5.3).

## **Method S5.3      NMR spectroscopy**

NMR spectra were recorded on a Bruker Avance III instrument (<sup>1</sup>H NMR: 400 MHz, <sup>13</sup>C NMR: 100.6 MHz). Chemical shifts were referenced to tetramethylsilane (TMS) as internal standard in DMSO-*d*<sub>6</sub> and reported in parts per million (ppm). For D<sub>2</sub>O as solvent, chemical shifts were referenced to residual H<sub>2</sub>O in the samples. Signals are described using the abbreviations: br = broad, s = singlet, d = duplet, t = triplet, q = quartet, m = multiplet, and combinations thereof.

## Protein sequences

Molecular weights and extinction coefficients, used for quantification of protein concentration by measurements of absorbance at 280 nm, were calculated using the ExPASy ProtParam tool.

### *Arabidopsis thaliana* halide methyltransferase

- NCBI Reference Sequence: NP\_001318420.1
- Extinction coefficient (280 nm): 42065 M<sup>-1</sup>cm<sup>-1</sup>
- Molecular weight: 27.452 kDa

```
MGSSHHHHHHSSGLVPRGSHMAEEQQNSDQSNNGNVIPTPEEVATFLHKTVEEGGWEKCEWEEIITPWDQ
GRATPLIVHLVDTSSSLPLGRALVPGCGGGHDVVAMASPERFVVGLDISESALAKANETYGSSPKAEYFS
FVKEDVFTWRPTELFDLIFDYVFFCAIEPEMRPAWAKSMYELLKPDGELITLMPITDHSVGGPPYKVDV
STFEVLVPIGFKAHSVVEENPHAIPTKRGKEKLGKRWKIN
```

### *Chloracidobacterium thermophilum* halide methyltransferase

- GenBank: AEP12557.1
- Extinction coefficient (280 nm): 65680 M<sup>-1</sup>cm<sup>-1</sup>
- Molecular weight: 24.617 kDa

```
MGHHHHHHHAENLYFQGSGLGMDADTASFWEKYNRADLTAWDRGGVSPAHEHWLAEGALKPGRILIPGCG
YGHEVLALARRGFVWGLDIALTPVRRQLQEKLAQAGLTAHVVEGDVVRTWQPEQPFDAVYEQTCLCALSP
EDWPRYEAQLCRWLRPGRRLFALWMQTDPRGGPPYHCGLEAMRVLFALERWRWVEPPQRTVPHPHTGFFE
YAAILERLV
```

### *Raphanus sativus* halide methyltransferase

- GenBank: BAH84870.1
- Extinction coefficient (280 nm): 46535 M<sup>-1</sup>cm<sup>-1</sup>
- Molecular weight: 26.530 kDa

```
MAEGQQNSGNSNGENIIPPEDVAKFLPKTVEEGGWEKCEWEDGVTPWDQGRATPLVVHLVESSSLPLGRA
LVPGCGGGHDVVAMASPERYVVGLDISESALEKAAETYASSPKAKYFTFVKEDFFTWRPSELFDLIFDY
VVFCAIEPEMRAAWAKTMYELLKPDGELITLMPITDHDGGPPYKVAVSTYEDVLVPGVFKAVSIEENP
YSIATRKGKEKLGKRWKINKLAAALEHHHHHHH
```

*Homo sapiens* catechol O-methyltransferase (soluble-form)

- NCBI Reference Sequence: NP\_009294.1
- Extinction coefficient (280 nm): 23295 M<sup>-1</sup>cm<sup>-1</sup>
- Molecular weight: 24.449 kDa

MGDTKEQRILNHVLQHAEPGNAQSVLEAIDTYCEQKEWAMNVGDKKGKI VDAVIQEHQPSV LLELGAYC  
GYSAVRMARLLSPGARLITIEINPDCAAITQRMVDFAGVKDKVTLVVGASQDIIPQLKKKYD VDTLDMV  
FLDHWKDRYLPDTLLLEECGLLRKGTVLLADNVICPGAPDFLAHV RGSSCFECTHYQSFLEYREVDGL  
EKAIYKGP GSEAGPGSSGHHHHHH

*Curvularia inaequalis* vanadium-dependent chloroperoxidase

- Described by Hasan et al.<sup>[12]</sup>
- Extinction coefficient (280 nm): 93280 M<sup>-1</sup>cm<sup>-1</sup>
- Molecular weight: 70.105 kDa

MKKLLFAIPLVVPFYSHSTMASHMGSVTP IPLPKIDEPEEYNTNYILFWNHVGL ELNRVTHTVGGPLTG  
PPLSARALGMLHLAIHDAYFSICPPTDFTTFLSPDTENAAYRLPS PNGANDARQAVAGAALKMLSSLYM  
KPVEQPNPNPGANISDNAYAQLGLVLD RSVLEAPGGVDRESASF MFGEDVADVFFALLNDPRGASQEGY  
HPTPGRYKFDDEPTHPVVLIPVDPNPNPGPKMPFRQYHAPFYGKTTKRFATQSEHFVADPPGLRSNADE  
TAEYDDAVRVAIAMGGAQALNSTKRSPWQTAQGLYWAYDGSNLIGT PPRFYNQIVRRIAVTYKKEEDLA  
NSEVNNADFARLFALVDVACADAGIFSWKEKWEFEFWRPLSGVRDDGRPDHGD PFWLTLGAPATNTNDI  
PFKDFFPAYPSGHATFGGAVFQVRRY YNGRVGTWKDDEPDNIAIDMMISEELNGVNRDLRQPYDPTAP  
IEDQPGIVRTRIVRHFDSAWELMFENAI SRIFLGVHWRFDAAAARDILIP TTTKDVYAVDNNGATVFN  
VEDIRYTTRGTREDPEGLFP IGGVPLGIEIADEIFNNGLKPTPPEIQPMPQETPVQKPVGQQPVKGMWE  
EEQAPVVKEAP

## References

- [1] C. Liao, F. P. Seebeck, *Nat. Catal.* **2019**, *2*, 696-701.
- [2] Q. Tang, Y. M. Vianney, K. Weisz, C. W. Grathwol, A. Link, U. T. Bornscheuer, I. V. Pavlidis, *ChemCatChem* **2020**, *12*, 3721-3727.
- [3] M. T. Reetz, J. D. Carballeira, *Nat. Protoc.* **2007**, *2*, 891.
- [4] Y. Jiang, B. Chen, C. Duan, B. Sun, J. Yang, S. Yang, *Appl. Environ. Microbiol.* **2015**, *81*, 2506-2514.
- [5] Y. Zhang, U. Werling, W. Edelmann, *Nucleic Acids Res.* **2012**, *40*, e55-e55.
- [6] R. Green, E. J. Rogers, *Methods Enzymol.* **2013**, *529*, 329.
- [7] A. S. Aslan-Üzel, A. Beier, D. Kovář, C. Cziegler, S. K. Padhi, E. D. Schuiten, M. Dörr, D. Böttcher, F. Hollmann, F. Rudroff, M. D. Mihovilovic, T. Buryška, J. Damborský, Z. Prokop, C. P. S. Badenhorst, U. T. Bornscheuer, *ChemCatChem* **2020**, *12*, 1-9.
- [8] a) P. D. Josephy, T. Eling, R. P. Mason, *J. Biol. Chem.* **1982**, *257*, 3669-3675; b) P. M. Bozeman, D. B. Learn, E. L. Thomas, *J. Immunol. Methods* **1990**, *126*, 125-133.
- [9] U. K. Laemmli, *Nature* **1970**, *227*, 680-685.
- [10] B. J. Law, A.-W. Struck, M. R. Bennett, B. Wilkinson, J. Micklefield, *Chem. Sci.* **2015**, *6*, 2885-2892.
- [11] Q. Tang, U. T. Bornscheuer, I. V. Pavlidis, *ChemCatChem* **2019**, *11*, 3227-3233.
- [12] Z. Hasan, R. Renirie, R. Kerkman, H. J. Ruijssenaars, A. F. Hartog, R. Wever, *J. Biol. Chem.* **2006**, *281*, 9738-9744.
